# Supplementary material for: Snus Use in Adolescents: A Threat to Oral Health
Source: Preprints.org preprint supplement (doi:10.20944/preprints202405.1967.v1), 2024-05-29
Supplement: Supplementary file 1 [file supplementary]

**Supplementary material**

Supplementary Table 1 - Demographics

| **Characteristic** | **N** | **Overall** | **Usage of snus** |  |  | **p-value2** |
| --- | --- | --- | --- | --- | --- | --- |
|  |  | **N = 248 (100%)** | **Occasional user** | **Regular user** | **Never used snus** |  |
|  |  |  | N = 36 (15%)1 | N = 20 (8.1%)1 | N = 192 (77%)1 |  |
| **Sex** | 248 (100%) |  |  |  |  | 0.088 |
| **male** |  | 206 (83%) | 34 (94%) | 18 (90%) | 154 (80%) |  |
| **female** |  | 42 (17%) | 2 (5.6%) | 2 (10%) | 38 (20%) |  |
| **Age** | 246 (99%) |  |  |  |  |  |
| **12** |  | 2 (0.8%) | 0 (0%) | 0 (0%) | 2 (1.1%) |  |
| **13** |  | 26 (11%) | 0 (0%) | 0 (0%) | 26 (14%) |  |
| **14** |  | 33 (13%) | 1 (2.8%) | 0 (0%) | 32 (17%) |  |
| **15** |  | 52 (21%) | 2 (5.6%) | 2 (10%) | 48 (25%) |  |
| **16** |  | 53 (22%) | 11 (31%) | 1 (5.0%) | 41 (22%) |  |
| **17** |  | 43 (17%) | 16 (44%) | 5 (25%) | 22 (12%) |  |
| **18** |  | 20 (8.1%) | 2 (5.6%) | 5 (25%) | 13 (6.8%) |  |
| **19** |  | 16 (6.5%) | 4 (11%) | 7 (35%) | 5 (2.6%) |  |
| **20** |  | 1 (0.4%) | 0 (0%) | 0 (0%) | 1 (0.5%) |  |
| **NA** |  | 2 | 0 | 0 | 2 |  |
| **Location** | 248 (100%) |  |  |  |  | 0.009 |
| **village** |  | 53 (21%) | 3 (8.3%) | 1 (5.0%) | 49 (26%) |  |
| **capital city** |  | 45 (18%) | 9 (25%) | 4 (20%) | 32 (17%) |  |
| **capital city agglomeration** |  | 5 (2.0%) | 2 (5.6%) | 1 (5.0%) | 2 (1.0%) |  |
| **abroad** |  | 6 (2.4%) | 3 (8.3%) | 0 (0%) | 3 (1.6%) |  |
| **city** |  | 139 (56%) | 19 (53%) | 14 (70%) | 106 (55%) |  |
| **What regular sports activities do you engage in?** | 248 (100%) |  |  |  |  | <0.001 |
| **football** |  | 141 (57%) | 10 (28%) | 5 (25%) | 126 (66%) |  |
| **football, individual sport** |  | 3 (1.2%) | 0 (0%) | 0 (0%) | 3 (1.6%) |  |
| **ice-hockey** |  | 103 (42%) | 26 (72%) | 15 (75%) | 62 (32%) |  |
| **other team sport** |  | 1 (0.4%) | 0 (0%) | 0 (0%) | 1 (0.5%) |  |
| **Highest level of education of mother** | 247 (100%) |  |  |  |  |  |
| **8th elementary school grade** |  | 4 (1.6%) | 0 (0%) | 0 (0%) | 4 (2.1%) |  |
| **doctoral studies** |  | 2 (0.8%) | 0 (0%) | 0 (0%) | 2 (1.0%) |  |
| **university** |  | 77 (31%) | 17 (47%) | 5 (25%) | 55 (29%) |  |
| **college** |  | 53 (21%) | 5 (14%) | 3 (15%) | 45 (24%) |  |
| **secondary school** |  | 49 (20%) | 9 (25%) | 8 (40%) | 32 (17%) |  |
| **do not know** |  | 31 (13%) | 1 (2.8%) | 3 (15%) | 27 (14%) |  |
| **no educational qualifications** |  | 1 (0.4%) | 0 (0%) | 0 (0%) | 1 (0.5%) |  |
| **vocational training** |  | 30 (12%) | 4 (11%) | 1 (5.0%) | 25 (13%) |  |
| **NA** |  | 1 | 0 | 0 | 1 |  |
| **Highest level of education of father** | 248 (100%) |  |  |  |  |  |
| **8th elementary school grade** |  | 3 (1.2%) | 0 (0%) | 0 (0%) | 3 (1.6%) |  |
| **doctoral studies** |  | 2 (0.8%) | 1 (2.8%) | 0 (0%) | 1 (0.5%) |  |
| **university** |  | 63 (25%) | 14 (39%) | 6 (30%) | 43 (22%) |  |
| **college** |  | 55 (22%) | 6 (17%) | 4 (20%) | 45 (23%) |  |
| **secondary school** |  | 40 (16%) | 7 (19%) | 6 (30%) | 27 (14%) |  |
| **do not know** |  | 31 (13%) | 0 (0%) | 3 (15%) | 28 (15%) |  |
| **vocational training** |  | 54 (22%) | 8 (22%) | 1 (5.0%) | 45 (23%) |  |
| **Do you use any other tobacco products?** | 248 (100%) |  |  |  |  | 0.538 |
| Yes |  | 3 (1.2%) | 1 (2.8%) | 0 (0%) | 2 (1.0%) |  |
| No |  | 245 (99%) | 35 (97%) | 20 (100%) | 190 (99%) |  |
| **Do you consume articles containing marijuana/cannabis?** | 248 (100%) |  |  |  |  | 0.074 |
| Occasionally |  | 3 (1.2%) | 2 (5.6%) | 0 (0%) | 1 (0.5%) |  |
| No |  | 245 (99%) | 34 (94%) | 20 (100%) | 191 (99%) |  |
| **Do you consume drugs other than marijuana?** | 248 (100%) |  |  |  |  | >0.999 |
| No |  | 247 (100%) | 36 (100%) | 20 (100%) | 191 (99%) |  |
| Do not want to answer |  | 1 (0.4%) | 0 (0%) | 0 (0%) | 1 (0.5%) |  |

Supplementary Figure 1 - Specified harmful effects of snus known by the participants

Supplementary Table 2 - Harmful effects of snus

| **Do you know what harmful effects snus has on your body? - nervous system effects** | 248 (100%) |  |  |  |  | 0.131 |
| --- | --- | --- | --- | --- | --- | --- |
| Yes |  | 20 (8.1%) | 3 (8.3%) | 4 (20%) | 13 (6.8%) |  |
| No |  | 228 (92%) | 33 (92%) | 16 (80%) | 179 (93%) |  |
| **Do you know what harmful effects snus has on your body? - Gum-damaging effects** | 248 (100%) |  |  |  |  | 0.017 |
| Yes |  | 32 (13%) | 10 (28%) | 3 (15%) | 19 (9.9%) |  |
| No |  | 216 (87%) | 26 (72%) | 17 (85%) | 173 (90%) |  |
| **Do you know what harmful effects snus has on your body? - Tooth enamel-damaging effects** | 248 (100%) |  |  |  |  | 0.639 |
| Yes |  | 29 (12%) | 5 (14%) | 3 (15%) | 21 (11%) |  |
| No |  | 219 (88%) | 31 (86%) | 17 (85%) | 171 (89%) |  |
| **Do you know what harmful effects snus has on your body? - carcinogenic.** | 248 (100%) |  |  |  |  | <0.001 |
| Yes |  | 60 (24%) | 20 (56%) | 7 (35%) | 33 (17%) |  |
| No |  | 188 (76%) | 16 (44%) | 13 (65%) | 159 (83%) |  |
| **Do you know what harmful effects snus has on your body? - addiction** | 248 (100%) |  |  |  |  | 0.014 |
| Yes |  | 10 (4.0%) | 4 (11%) | 2 (10%) | 4 (2.1%) |  |
| No |  | 238 (96%) | 32 (89%) | 18 (90%) | 188 (98%) |  |
| **Do you know what harmful effects snus has on your body? - effect on oral hygiene deterioration** | 248 (100%) |  |  |  |  | 0.176 |
| Yes |  | 2 (0.8%) | 0 (0%) | 1 (5.0%) | 1 (0.5%) |  |
| No |  | 246 (99%) | 36 (100%) | 19 (95%) | 191 (99%) |  |
| **Do you know what harmful effects snus has on your body? - mucosal changes** | 248 (100%) |  |  |  |  | 0.813 |
| Yes |  | 37 (15%) | 4 (11%) | 3 (15%) | 30 (16%) |  |
| No |  | 211 (85%) | 32 (89%) | 17 (85%) | 162 (84%) |  |
| **Do you know what harmful effects snus has on your body? - tooth loss** | 248 (100%) |  |  |  |  | >0.999 |
| Yes |  | 6 (2.4%) | 1 (2.8%) | 0 (0%) | 5 (2.6%) |  |
| No |  | 242 (98%) | 35 (97%) | 20 (100%) | 187 (97%) |  |
| **Do you know what harmful effects snus has on your body? - systemic effects** | 248 (100%) |  |  |  |  | 0.007 |
| Yes |  | 31 (13%) | 2 (5.6%) | 7 (35%) | 22 (11%) |  |
| No |  | 217 (88%) | 34 (94%) | 13 (65%) | 170 (89%) |  |
| **Do you know what harmful effects snus has on your body? - Do not know** | 247 (100%) |  |  |  |  | 0.011 |
| Yes |  | 109 (44%) | 9 (25%) | 6 (30%) | 94 (49%) |  |
| No |  | 138 (56%) | 27 (75%) | 14 (70%) | 97 (51%) |  |

Supplementary Table 3 – Snus consumption habits

|  | **N** | **Overall** | **Occasional user** | **Regular user** | **p-value2** |
| --- | --- | --- | --- | --- | --- |
|  |  | 248  (100%) | 36  (15%) | 20  (8.1%) |  |
| **When did you first try snus?** | 56 (23%) |  |  |  | 0.263 |
| 12-13 |  | 2 (3.6%) | 0 (0%) | 2 (10%) |  |
| 13-14 |  | 4 (7.1%) | 3 (8.3%) | 1 (5.0%) |  |
| 14-15 |  | 18 (32%) | 11 (31%) | 7 (35%) |  |
| 15-16 |  | 18 (32%) | 14 (39%) | 4 (20%) |  |
| 16 years old or older |  | 14 (25%) | 8 (22%) | 6 (30%) |  |
| NA |  | 192 | 0 | 0 |  |
| **What type of snus do you use?** | 8 (3.2%) |  |  |  | >0.999 |
| Portion/ pouch/ sachet |  | 6 (78%) |  | 6 (78%) |  |
| Filtered |  | 1 (13%) |  | 1 (13%) |  |
| Loose |  | 1 (13%) |  | 1 (13%) |  |
| NA |  | 240 | 36 | 12 |  |
| **Where do you place it inside your mouth?** | 20 (8.1%) |  |  |  | >0.999 |
| Between the upper lip and the gum |  | 19 (95%) |  | 19 (95%) |  |
| Between the upper lip and the gum, between the lower lip and the gum |  | 1 (5.0%) |  | 1 (5.0%) |  |
| NA |  | 228 | 36 | 0 |  |
| **On average, how many minutes do you keep a portion of snus in your mouth?** | 20 (8.1%) |  |  |  | >0.999 |
| <10 minutes |  | 7 (35%) |  | 7 (35%) |  |
| 10-30 minutes |  | 9 (45%) |  | 9 (45%) |  |
| 30-60 minutes |  | 2 (10%) |  | 2 (10%) |  |
| Variable |  | 2 (10%) |  | 2 (10%) |  |
| NA |  | 228 | 36 | 0 |  |
| **Do you usually keep multiple portions in your mouth at once?** | 20 (8.1%) |  |  |  | >0.999 |
| Yes |  | 6 (30%) |  | 6 (30%) |  |
| No |  | 14 (70%) |  | 14 (70%) |  |
| NA |  | 228 | 36 | 0 |  |
| **How often do you use snus?** | 20 (8.1%) |  |  |  | >0.999 |
| Occasionally |  | 6 (30%) |  | 6 (30%) |  |
| A few times a week |  | 1 (5.0%) |  | 1 (5.0%) |  |
| Daily |  | 4 (20%) |  | 4 (20%) |  |
| Multiple times a day |  | 9 (45%) |  | 9 (45%) |  |
| NA |  | 228 | 36 | 0 |  |
| **How many years have you been using it regularly?** | 17 (6.9%) |  |  |  | >0.999 |
| 0 |  | 1 (5.9%) |  | 1 (5.9%) |  |
| 1 |  | 7 (41%) |  | 7 (41%) |  |
| 2 |  | 5 (29%) |  | 5 (29%) |  |
| 3 |  | 1 (5.9%) |  | 1 (5.9%) |  |
| 4 |  | 2 (12%) |  | 2 (12%) |  |
| 6 |  | 1 (5.9%) |  | 1 (5.9%) |  |
| NA |  | 231 | 36 | 3 |  |

Supplementray Table 4 - Oral status, oral hygiene habits

| **Do you experience ulcerative lesions in your mouth?** | 20 (8.1%) |  |  |  |  | >0.999 |
| --- | --- | --- | --- | --- | --- | --- |
| Yes, but they occur elsewhere |  | 1 (5.0%) | 0 (NA%) | 1 (5.0%) | 0 (NA%) |  |
| Yes, where the snus comes into contact |  | 5 (25%) | 0 (NA%) | 5 (25%) | 0 (NA%) |  |
| No |  | 14 (70%) | 0 (NA%) | 14 (70%) | 0 (NA%) |  |
| NA |  | 228 | 36 | 0 | 192 |  |
| **How often do you brush your teeth?** | 248 (100%) |  |  |  |  | 0.176 |
| Every two days |  | 2 (0.8%) | 0 (0%) | 0 (0%) | 2 (1.0%) |  |
| Once a day |  | 38 (15%) | 5 (14%) | 3 (15%) | 30 (16%) |  |
| Twice a day |  | 178 (72%) | 31 (86%) | 14 (70%) | 133 (69%) |  |
| Multiple times a day |  | 30 (12%) | 0 (0%) | 3 (15%) | 27 (14%) |  |
| **What tools do you use?** | 248 (100%) |  |  |  |  |  |
| Electric toothbrush |  | 38 (15%) | 9 (25%) | 3 (15%) | 26 (14%) |  |
| Toothbrush + other (e.g., wooden toothpick) |  | 19 (7.7%) | 1 (2.8%) | 1 (5.0%) | 17 (8.9%) |  |
| Toothbrush + dental floss / interdental cleaner |  | 16 (6.5%) | 2 (5.6%) | 1 (5.0%) | 13 (6.8%) |  |
| Toothbrush + dental floss / interdental cleaner + mouthwash |  | 17 (6.9%) | 0 (0%) | 0 (0%) | 17 (8.9%) |  |
| Toothbrush + mouthwash |  | 53 (21%) | 10 (28%) | 3 (15%) | 40 (21%) |  |
| Toothbrush + mouthwash + other |  | 22 (8.9%) | 3 (8.3%) | 4 (20%) | 15 (7.8%) |  |
| Manual + electric toothbrush |  | 13 (5.2%) | 1 (2.8%) | 3 (15%) | 9 (4.7%) |  |
| Manual toothbrush |  | 70 (28%) | 10 (28%) | 5 (25%) | 55 (29%) |  |
| **What toothpaste do you use?** | 248 (100%) |  |  |  |  | 0.279 |
| Fluoride-free |  | 9 (3.6%) | 2 (5.6%) | 2 (10%) | 5 (2.6%) |  |
| Fluoridated |  | 92 (37%) | 11 (31%) | 6 (30%) | 75 (39%) |  |
| Doesn't know, but uses toothpaste |  | 147 (59%) | 23 (64%) | 12 (60%) | 112 (58%) |  |
| **Do your gums tend to bleed when brushing your teeth?** | 244 (98%) |  |  |  |  | 0.040 |
| Yes |  | 91 (37%) | 9 (26%) | 12 (60%) | 70 (37%) |  |
| No |  | 153 (63%) | 26 (74%) | 8 (40%) | 119 (63%) |  |
| NA |  | 4 | 1 | 0 | 3 |  |
| **Fluorosis** | 248 (100%) |  |  |  |  | 0.305 |
| healthy |  | 92 (37%) | 9 (25%) | 9 (45%) | 74 (39%) |  |
| mild |  | 1 (0.4%) | 0 (0%) | 1 (5.0%) | 0 (0%) |  |
| questionable |  | 2 (0.8%) | 0 (0%) | 0 (0%) | 2 (1.0%) |  |
| moderate |  | 1 (0.4%) | 0 (0%) | 0 (0%) | 1 (0.5%) |  |
| missing |  | 1 (0.4%) | 0 (0%) | 0 (0%) | 1 (0.5%) |  |
| very mild |  | 3 (1.2%) | 1 (2.8%) | 0 (0%) | 2 (1.0%) |  |
| Not examinated |  | 148 (60%) | 26 (72%) | 10 (50%) | 112 (58%) |  |
| **Have you noticed any of the following symptoms? - coated tongue, white coating** | 85 (34%) |  |  |  |  | 0.562 |
| Yes |  | 29 (34%) | 2 (18%) | 4 (36%) | 23 (37%) |  |
| No |  | 56 (66%) | 9 (82%) | 7 (64%) | 40 (63%) |  |
| NA |  | 163 | 25 | 9 | 129 |  |
| **Have you noticed any of the following symptoms? - bad taste in the mouth** | 85 (34%) |  |  |  |  | 0.432 |
| Yes |  | 26 (31%) | 5 (45%) | 2 (18%) | 19 (30%) |  |
| No |  | 59 (69%) | 6 (55%) | 9 (82%) | 44 (70%) |  |
| NA |  | 163 | 25 | 9 | 129 |  |
| **Have you noticed any of the following symptoms? - sore on the gum** | 85 (34%) |  |  |  |  | 0.403 |
| Yes |  | 27 (32%) | 2 (18%) | 5 (45%) | 20 (32%) |  |
| No |  | 58 (68%) | 9 (82%) | 6 (55%) | 43 (68%) |  |
| NA |  | 163 | 25 | 9 | 129 |  |
| **Have you noticed any of the following symptoms? - sharp, burning sensation.** | 85 (34%) |  |  |  |  | <0.001 |
| Yes |  | 8 (9.4%) | 1 (9.1%) | 5 (45%) | 2 (3.2%) |  |
| No |  | 77 (91%) | 10 (91%) | 6 (55%) | 61 (97%) |  |
| NA |  | 163 | 25 | 9 | 129 |  |
| **Have you noticed any of the following symptoms? - dry mouth** | 85 (34%) |  |  |  |  | 0.499 |
| Yes |  | 20 (24%) | 1 (9.1%) | 2 (18%) | 17 (27%) |  |
| No |  | 65 (76%) | 10 (91%) | 9 (82%) | 46 (73%) |  |
| NA |  | 163 | 25 | 9 | 129 |  |
| **How often do you visit the dentist?** | 248 (100%) |  |  |  |  |  |
| Only when it hurts |  | 41 (17%) | 5 (14%) | 2 (10%) | 34 (18%) |  |
| Yearly |  | 72 (29%) | 16 (44%) | 3 (15%) | 53 (28%) |  |
| Every six months |  | 76 (31%) | 12 (33%) | 4 (20%) | 60 (31%) |  |
| More frequently than every six months |  | 48 (19%) | 3 (8.3%) | 9 (45%) | 36 (19%) |  |
| Less frequently than yearly |  | 11 (4.4%) | 0 (0%) | 2 (10%) | 9 (4.7%) |  |
| **Are you aware of gum problems?** | 247 (100%) |  |  |  |  | 0.002 |
| Yes |  | 5 (2.0%) | 1 (2.8%) | 3 (15%) | 1 (0.5%) |  |
| No |  | 242 (98%) | 35 (97%) | 17 (85%) | 190 (99%) |  |
| NA |  | 1 | 0 | 0 | 1 |  |
| **Do you use a mouthguard?** | 247 (100%) |  |  |  |  | <0.001 |
| Only during training |  | 1 (0.4%) | 1 (2.9%) | 0 (0%) | 0 (0%) |  |
| only during matches |  | 15 (6.1%) | 5 (14%) | 3 (15%) | 7 (3.6%) |  |
| Yes, regurarly |  | 14 (5.7%) | 5 (14%) | 3 (15%) | 6 (3.1%) |  |
| Do not use |  | 217 (88%) | 24 (69%) | 14 (70%) | 179 (93%) |  |
| NA |  | 1 | 1 | 0 | 0 |  |
| **mouthguard/ dental splint usage** | 247 (100%) |  |  |  |  | <0.001 |
| Use |  | 30 (12%) | 11 (31%) | 6 (30%) | 13 (6.8%) |  |
| do not use |  | 217 (88%) | 24 (69%) | 14 (70%) | 179 (93%) |  |
| NA |  | 1 | 1 | 0 | 0 |  |
| ­Note: The low number of patients (30, 12%) using mouthguard was due to the obligation for children to wear a cage to protect their heads from injuries. Therefore, almost no traumatic tooth loss could be noticed. | | | | | | |
| **Mouthguard type** | 248 (100%) |  |  |  |  | <0.001 |
| Individually crafted by a professional |  | 11 (4.4%) | 1 (2.8%) | 3 (15%) | 7 (3.6%) |  |
| Do not use |  | 218 (88%) | 25 (69%) | 14 (70%) | 179 (93%) |  |
| Not professionally crafted |  | 18 (7.3%) | 9 (25%) | 3 (15%) | 6 (3.1%) |  |
| do not know |  | 1 (0.4%) | 1 (2.8%) | 0 (0%) | 0 (0%) |  |
| **Dental condition** | 248 (100%) |  |  |  |  | 0.183 |
| Tooth loss |  | 11 (4.4%) | 1 (2.8%) | 1 (5.0%) | 9 (4.7%) |  |
| Decay |  | 118 (48%) | 18 (50%) | 15 (75%) | 85 (44%) |  |
| Completely healthy teeth |  | 80 (32%) | 13 (36%) | 2 (10%) | 65 (34%) |  |
| Filling, no decay |  | 39 (16%) | 4 (11%) | 2 (10%) | 33 (17%) |  |
| **Gum bleeding (groups)** | 248 (100%) |  |  |  |  |  |
| < 10% |  | 48 (19%) | 2 (5.6%) | 6 (30%) | 40 (21%) |  |
| > 50% |  | 13 (5.2%) | 1 (2.8%) | 4 (20%) | 8 (4.2%) |  |
| 10 - 20% |  | 21 (8.5%) | 6 (17%) | 1 (5.0%) | 14 (7.3%) |  |
| 20 - 50% |  | 25 (10%) | 6 (17%) | 2 (10%) | 17 (8.9%) |  |
| NA |  | 141 (57%) | 21 (58%) | 7 (35%) | 113 (59%) |  |
| **Tooth erosion** | 241 (97%) |  |  |  |  | 0.275 |
| No sign |  | 238 (99%) | 33 (100%) | 19 (95%) | 186 (99%) |  |
| Enamel lesion |  | 3 (1.2%) | 0 (0%) | 1 (5.0%) | 2 (1.1%) |  |
| NA |  | 7 | 3 | 0 | 4 |  |

Supplementary Table 5 – The combined effect of snus usage and oral hygiene habits on gum bleeding

| **Characteristic** | **N** | **Overall** | **Usage of snus and tooth brushing** | | | | | | **p-value***2* |
| --- | --- | --- | --- | --- | --- | --- | --- | --- | --- |
| N = 248 (100%) | **Occasional use of snus, tooth brushing once a day or less** | **Occasional use of snus, tooth brushing at least twice a day** | **Regular use of snus, tooth brushing once a day or less** | **Regular use of snus, tooth brushing at least twice a day** | **Never use snus, tooth brushing once a day or less** | **Never use snus, tooth brushing at least twice a day** |
|  | N = 5 (2.0%)*1* | N = 31 (13%)*1* | N = 3 (1.2%)*1* | N = 17 (6.9%)*1* | N = 32 (13%)*1* | N = 160 (65%)*1* |
| **Does your gums bleed when you brush your teeth?** | 244 (98%) |  |  |  |  |  |  |  | 0.003 |
| yes |  | 91 (37%) | 3 (60%) | 6 (20%) | 3 (100%) | 9 (53%) | 17 (55%) | 53 (34%) |  |
| no |  | 153 (63%) | 2 (40%) | 24 (80%) | 0 (0%) | 8 (47%) | 14 (45%) | 105 (66%) |  |

Supplementary Table 6 - Dental caries

|  |  | **Overall** | **Occasional user** | **Regular user** | **Never used snus** | **p-value** |
| --- | --- | --- | --- | --- | --- | --- |
| **Dental condition** | 248 (100%) |  |  |  |  | 0.183 |
| Tooth loss |  | 11 (4.4%) | 1 (2.8%) | 1 (5.0%) | 9 (4.7%) |  |
| Decay |  | 118 (48%) | 18 (50%) | 15 (75%) | 85 (44%) |  |
| Completely healthy teeth |  | 80 (32%) | 13 (36%) | 2 (10%) | 65 (34%) |  |
| Filling, no decay |  | 39 (16%) | 4 (11%) | 2 (10%) | 33 (17%) |  |

Supplementary Table 7 - The combined effect of snus usage and oral hygiene habits on dental caries

|  |  | **Overall** | **Occasional use of snus, tooth brushing once a day or less** | **Occasional use of snus, tooth brushing at least twice a day** | **Regular use of snus, tooth brushing once a day or less** | **Regular use of snus, tooth brushing at least twice a day** | **Never use snus, tooth brushing once a day or less** | **Never use snus, tooth brushing at least twice a day** | **p-value** |
| --- | --- | --- | --- | --- | --- | --- | --- | --- | --- |
| **Dental status** | 248 (100%) |  |  |  |  |  |  |  | 0.529 |
| Tooth loss |  | 11 (4.4%) | 0 (0%) | 1 (3.2%) | 0 (0%) | 1 (5.9%) | 2 (6.3%) | 7 (4.4%) |  |
| Decay |  | 118 (48%) | 4 (80%) | 14 (45%) | 3 (100%) | 12 (71%) | 17 (53%) | 68 (43%) |  |
| Completely healthy |  | 80 (32%) | 1 (20%) | 12 (39%) | 0 (0%) | 2 (12%) | 7 (22%) | 58 (36%) |  |
| Filled, not decayed |  | 39 (16%) | 0 (0%) | 4 (13%) | 0 (0%) | 2 (12%) | 6 (19%) | 27 (17%) |  |

For all tables above:

| *1* n (%) |
| --- |
| *2* Fisher’s exact test |
| * Fisher’s Exact Test for Count Data with simulated p-value (based on 2000 replicates) |
